# Supplementary material
Source: PubMed Central journal article supplement (PMC8294829)
Supplement: NIHMS1599140-supplement-ESI.pdf [file NIHMS1599140-supplement-ESI.pdf]

1 **Supporting Information**

2  
3

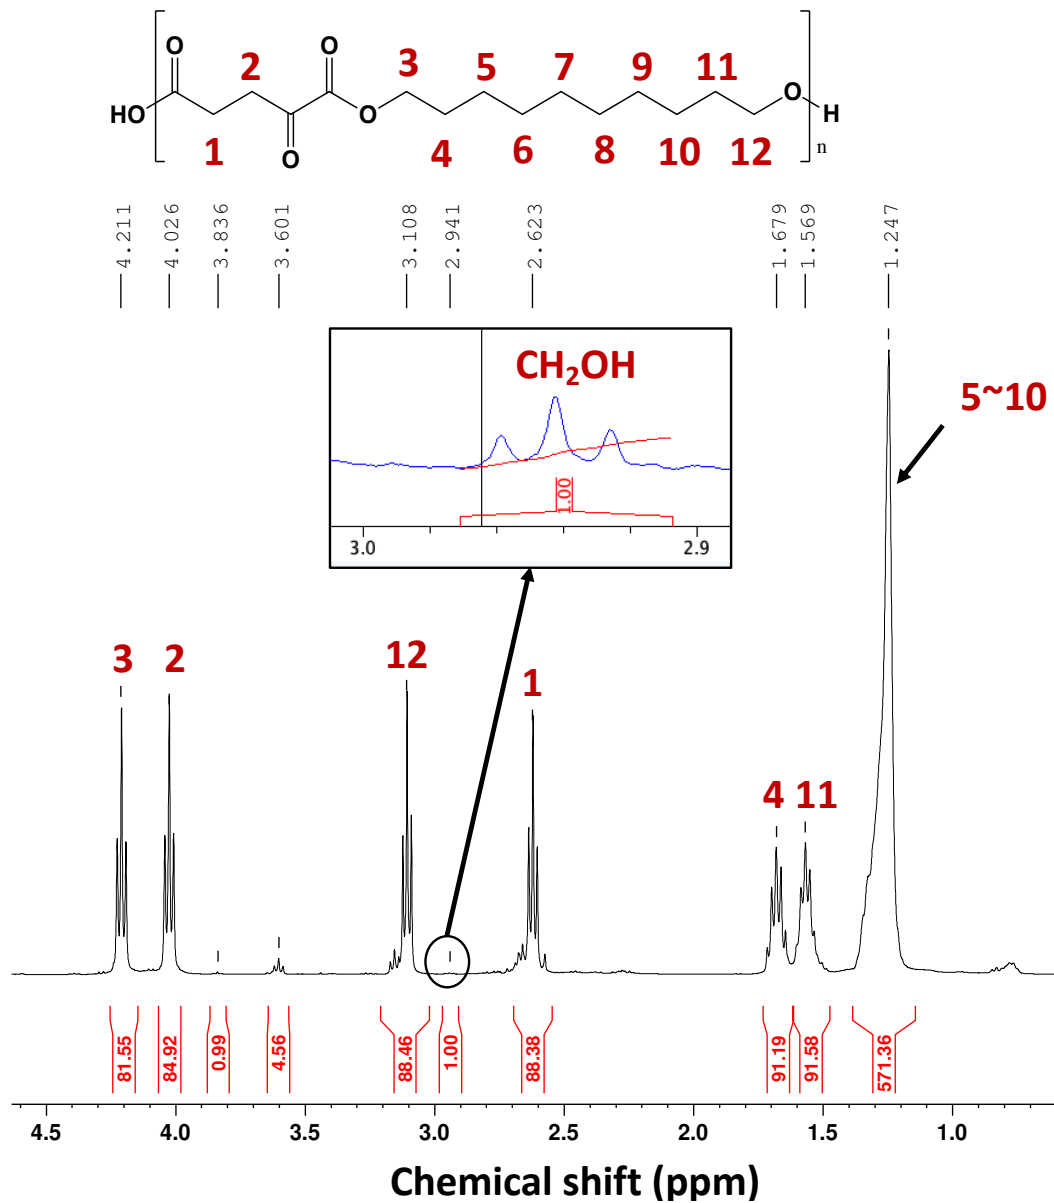

4  
5

6 **Figure S1: <sup>1</sup>H NMR spectrum of paKG polymer.** The <sup>1</sup>H NMR spectra demonstrates that  
7 the polymer was generated with aKG and 1, 10-decanediol as monomers.

8

### Molecular weight measurement via GPC

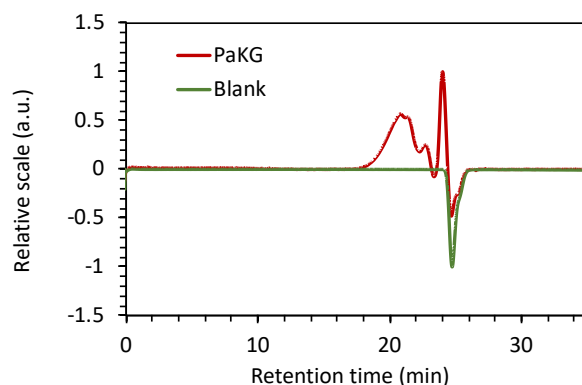

| *          | M <sub>n</sub> (kDa) | M <sub>w</sub> (kDa) | PDI  | dn/dc (mL/g) |
|------------|----------------------|----------------------|------|--------------|
| Method I   | 15.3                 | 20.5                 | 1.33 | N/A          |
| Method II  | 16.3                 | 19.2                 | 1.18 | 0.114        |
| Method III | 23.9                 | N/A                  | N/A  | N/A          |

\*Method I: M<sub>n</sub> and M<sub>w</sub> are calibrated by polystyrene standards (500 kDa, 200 kDa, 100 kDa, 30 kDa, 10 kDa, and 5 kDa)

Method II: M<sub>w</sub> is calculated by the measurement of dn/dc value of PaKG sample

Method III: M<sub>n</sub> based on calculation of degree of polymerization from <sup>1</sup>H NMR

1  
2 **Figure S2: Molecular weight determination of the paKG polymer. Method I - M<sub>n</sub> and**  
3 **M<sub>w</sub> are calculated using a calibration curve generated from polystyrene standards 500 KDa,**  
4 **200KDa, 100 KDa, 30 KDa, 10 KDa and 5 kDa, obtained from Agilent). Method II: M<sub>w</sub> is**  
5 **calculated by determining the refractive index increment (dn/dc) using the refractive index**  
6 **detector and the assumption of 100% recovery, then using the light scattering detector**  
7 **response to determine an absolute molecular weight. Method III: M<sub>n</sub> based on calculation of**  
8 **degree of polymerization using integrations from the <sup>1</sup>H NMR spectrum.**

9

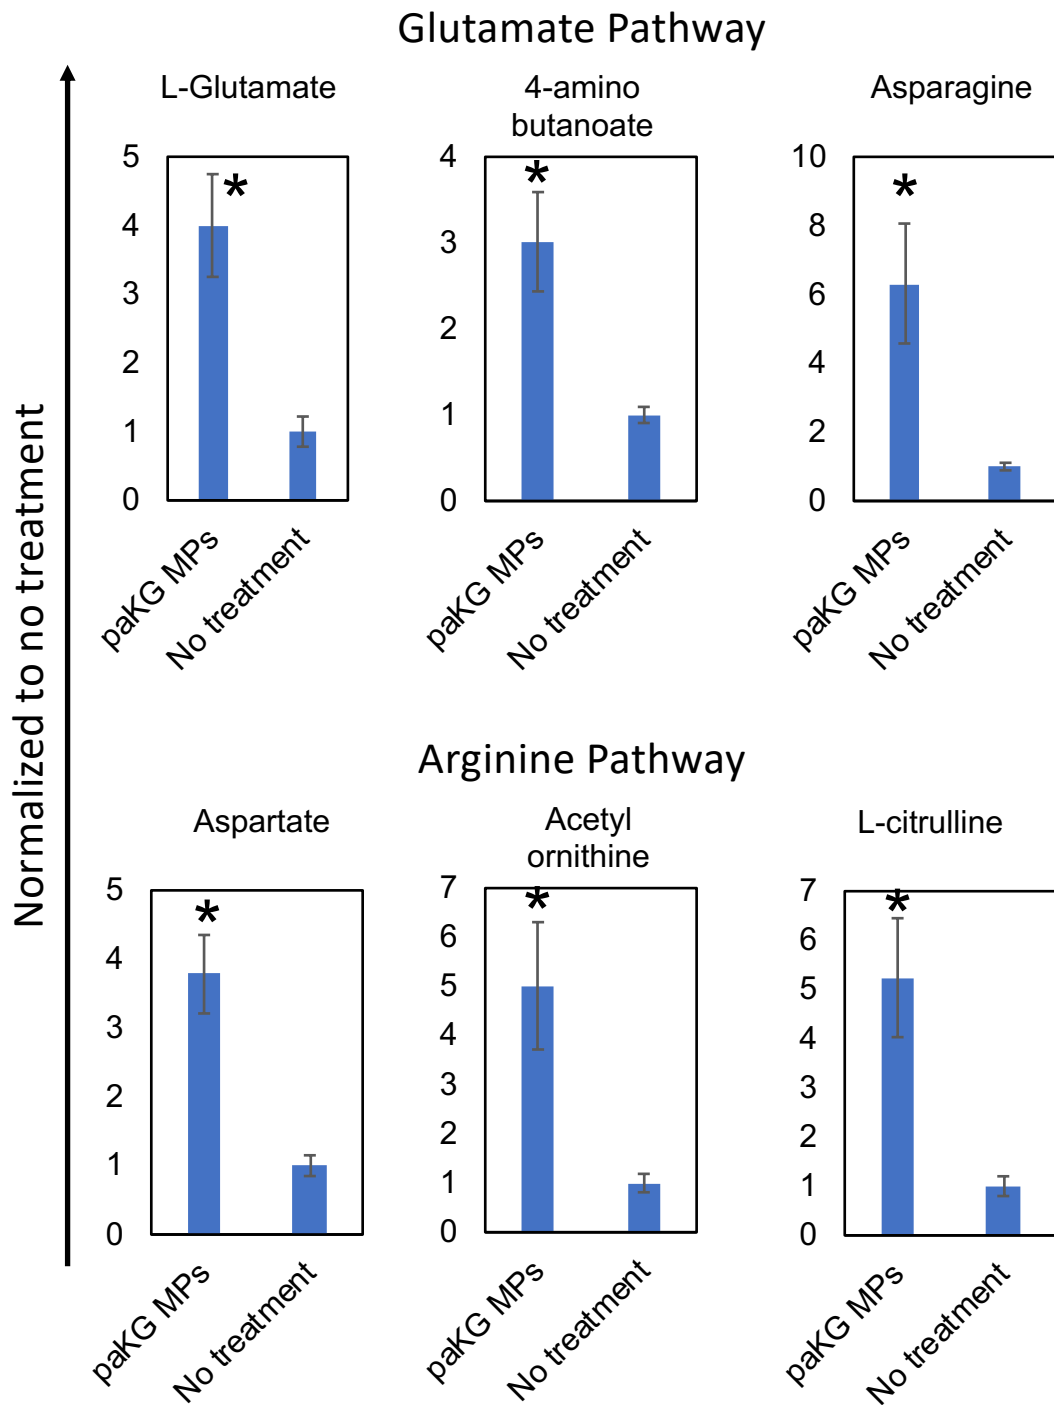

1

2 **Figure S3:** Glutamate and Arginine pathways are significantly upregulated in DCs treated  
 3 with paKG MPs as compared to no treatment (n=3, avg ± SEM, \* - p<0.05).

4

1

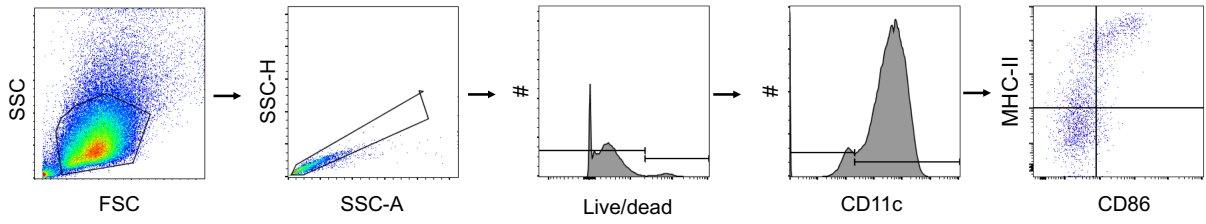

2

3 **Figure S4: Representative images of analyses of DCs using flow cytometry analyses.**

4

5

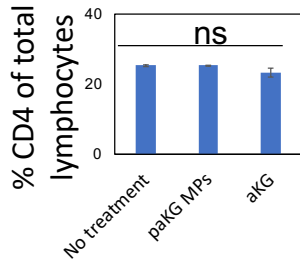

6

7

8 **Figure S5: paKG microparticles do not modulate frequency of CD4 population in**

9 **allogenic MLR (ns = not significant; n=6, avg ± SEM).**

10

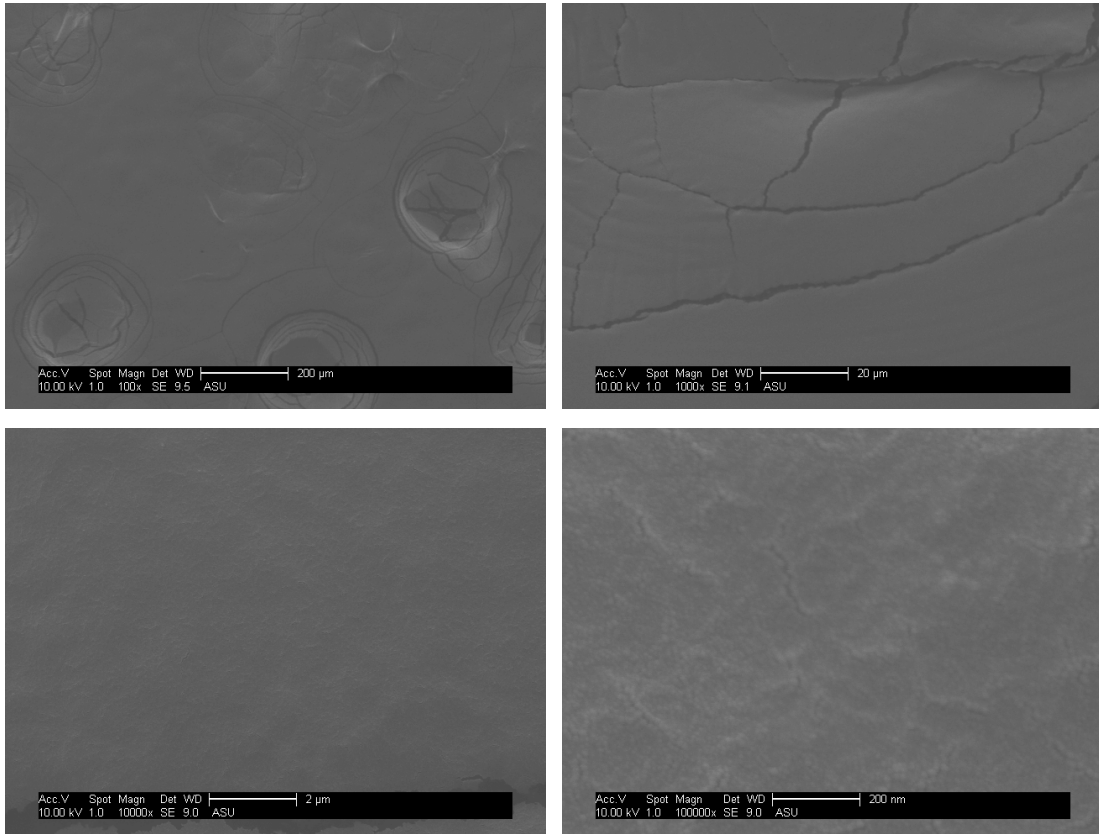

1

2 **Figure S6:** Supernatant of aKG particles was visualized under scanning electron microscope  
3 at increasing magnification at multiple spots (representative images shown) to confirm that  
4 no particles were left in the supernatant (n = 2).

5

6

7
